# Supplementary material for: Palladium nanoparticle catalysts in ionic liquids: synthesis, characterisation and selective partial hydrogenation of alkynes to Z-alkenes
Source: Royal Society of Chemistry journal article supplement (doi:10.1039/c0jm03557b), 2011-01-01
Supplement: c0jm03557b.pdf [file c0jm03557b.pdf]

# Palladium Nanoparticle Catalysts in Ionic Liquids: Synthesis, Characterisation and Selective Partial Hydrogenation of Alkynes to Z-Alkenes

Ramprakash Venkatesan,<sup>a</sup> Martin H. G. Precht,<sup>†\*ab</sup> Jackson D. Scholten,<sup>a</sup> Rafael P. Pezzi,<sup>a</sup> Giovanna Machado<sup>c</sup> and Jairton Dupont<sup>\*a</sup>

Received 20th October 2010, Accepted 7th December 2010

DOI: 10.1039/c0jm03557b

## Supplementary Material

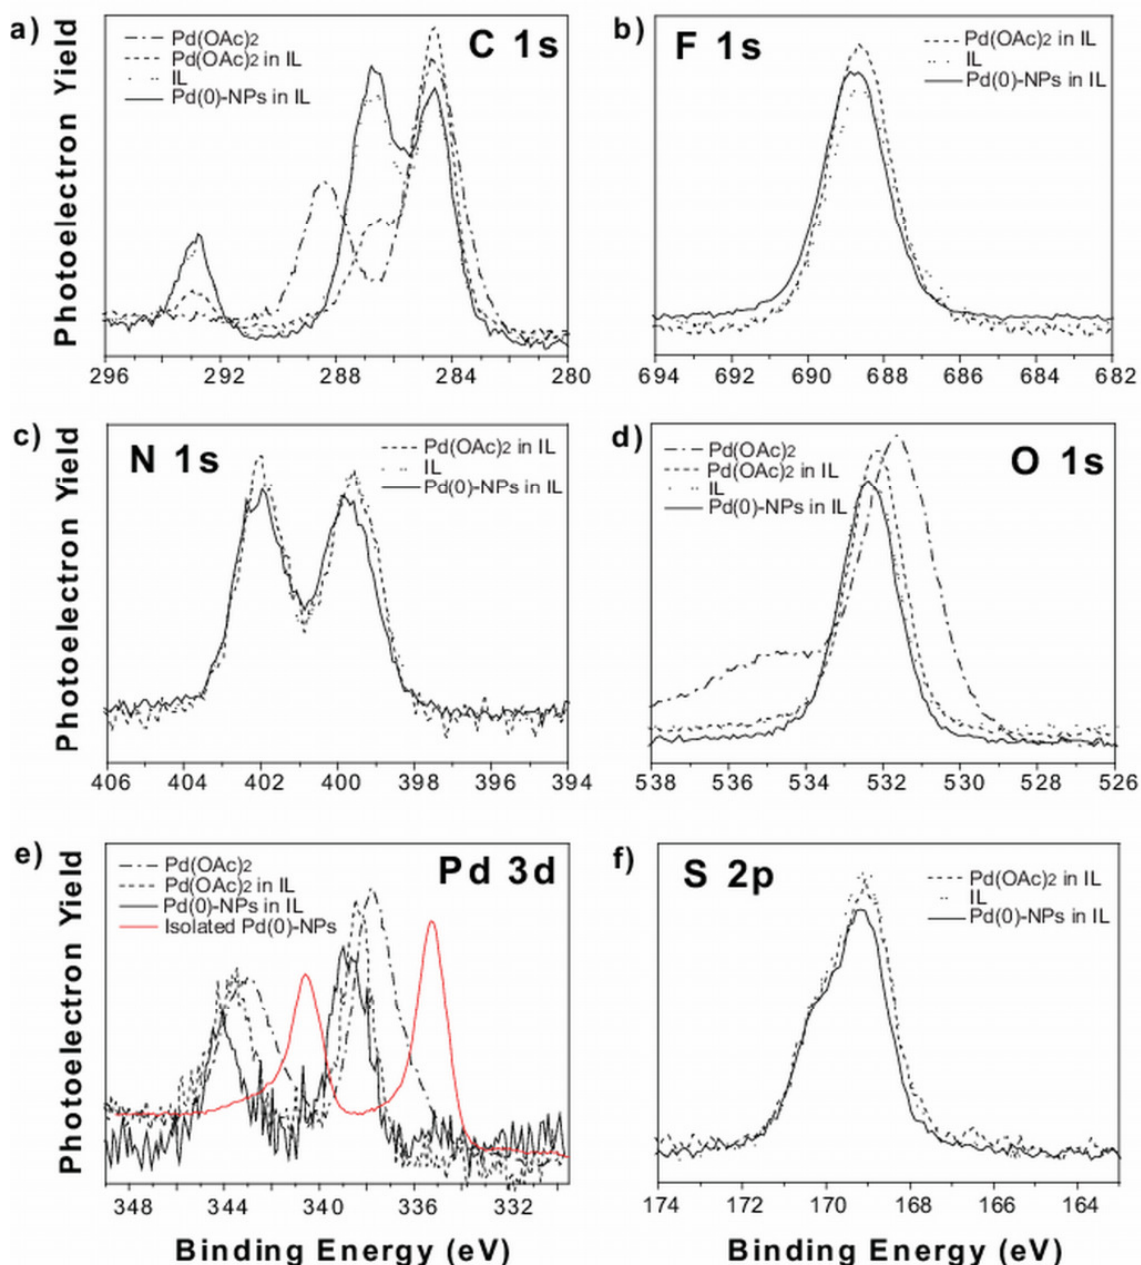

Fig. 3 XPS analyses of palladium in IL.

10
